# 1 **Mutational destabilisation accelerates the evolution of novel sensory and network functions**

2  
3 Yuki Kimura<sup>1</sup>, Shigeko Kawai-Noma<sup>2</sup> and Daisuke Umeno<sup>1\*</sup>

4  
5 <sup>1</sup>Department of Applied Chemistry, Waseda University, Japan

6 <sup>2</sup>Department of Applied Chemistry and Biotechnology, Chiba University, Japan

7 \*E-mail: umeno@waseda.jp

## 8 9 **Abstract**

10 **Binding-induced folding<sup>1-4</sup> (BIF) is a promising mechanism that can be used to rapidly convert**  
11 **binders into sensors/regulators without allosteric design. Here we showed that allosteric**  
12 **regulatory proteins AraC can acquire BIF mechanism without compromising their inherent**  
13 **allosteric mechanisms, with high frequency upon mutations. This opened an opportunity to**  
14 **compare the evolutionary capacity of the allosteric and non-allosteric modes of a specific sensory**  
15 **protein. We found that AraC evolved novel sensory function far more rapidly in BIF mode than**  
16 **in allosteric mode. This newly acquired (non-allosteric) sensory function is distinguishable both**  
17 **in its response logic and in sensitivity from original (allosteric) one, and they can be operated**  
18 **simultaneously, independently, and cooperatively, allowing the construction of complex**  
19 **regulatory networks behaviours such as a selective NIMPLY/OR converter and width-tuneable**  
20 **band-pass filter. Together with its high frequency of emergence, BIF can be an overlooked**  
21 **evolutionary driver of the invention of novel biosensors and complex regulatory networks in**  
22 **nature and laboratory.**

## 1 **Main**

2 Metabolic networks achieve high efficiency, robustness, and dynamic responsiveness to environmental changes  
3 through the placement of multiple allosteric regulators in key positions<sup>5-8</sup>. Each of these regulators has evolved  
4 high-fidelity response to the target molecules through a sophisticated allosteric mechanism: to selectively  
5 recognise the target molecules in the presence of numerous metabolites, allosteric regulators require a structural  
6 transition associated with binding, thereby preventing false-responses to the non-specific interaction with off-  
7 target molecules<sup>9,10</sup>.

8 On the contrary, an over-reliance on allosteric regulators could lead to a reduction in the evolvability of  
9 metabolic networks. New allosteric regulators can only be created when a specific binding interface and a  
10 mechanism to transmit the new interaction into a clear structural transition have emerged simultaneously<sup>11,12</sup>.  
11 This is in addition to the constraint that metabolic regulators fulfil an original function within the existing  
12 network. Despite these constraints, new functions are constantly being created in nature, both at the component  
13 level and at the network level<sup>13,14</sup>. We are interested in how natural metabolic systems attain functional  
14 robustness and evolutionary plasticity, apparently contradictory traits.

15 We suggest that binding induced folding (BIF) is a possible mechanism for searching for novel sensory  
16 and network functions. BIF has originally received attention as a novel and convenient strategy for converting  
17 binder into sensors<sup>1-4</sup>. Instead of conducting transition from an inactive structure to an active structure triggered  
18 by binding with the target molecule, BIF-sensors exert their response by folding facilitated by interaction with  
19 the target molecules.

20 In this study, we questioned our hypothesis that BIF could be the key features that accelerate exploration  
21 of new sensory functions and complex network functions. Upon random mutagenesis, allosteric regulator AraC  
22 was converted into binding-induced folder with surprising frequency, without compromising its original  
23 function as allosteric regulators. We demonstrate that sensor functions in this BIF mode can access novel  
24 sensory functions far more frequently than those operating in the allosteric mode. The novel sensor functions  
25 obtained in the BIF mode can work independently and simultaneously with the functions of the allosteric mode  
26 in a single cell, and their cooperation has yielded complex network functions in a predictable way and with a  
27 minimal set of components. Collectively, mutation-induced destabilisation<sup>15-21</sup>, which has been regarded as a  
28 mere evolutionary constraint, can be a largely overlooked accelerator of protein evolution, through which mere

1 molecular binding turns selectable both to the evolving metabolic network and to synthetic biologists.

2

### 3 **AraC-inducing systems**

4 AraC, an L-arabinose-responsive transcription factor<sup>22</sup>, is a classic example of allosteric switches.  
5 Without L-arabinose, it forms a dimer and binds to the I1 and O2 sites on the target DNA to form a  
6 DNA loop that prevents RNA polymerase from accessing the promoter. Upon binding with L-arabinose,  
7 AraC undergoes a conformational change, triggering the re-positioning of the O2-bound AraC to the  
8 I2 site, which allows the recruitment of RNA polymerase to activate transcription initiation from the  
9 P<sub>BAD</sub> promoter. Hence, L-arabinose is the allosteric effector that triggers this dynamic negative-to-  
10 positive regulation, enabling high signal-to-noise transcription control (**Fig. 1a**).

11 Reeder and Schleif showed that binding of L-arabinose is not a prerequisite for AraC-induced  
12 transcription activation when the O2 site is removed<sup>23</sup>. They tested a series of P<sub>BAD</sub> promoter variants  
13 and found an interesting variant termed P<sub>BAD7</sub>. This variant lacks the O2 site and has two tandemly  
14 repeated I1 sites, one of which overlaps the -35 box (**Extended Data Table 1**). Because AraC dimer  
15 has the highest binding affinity for I1<sup>24</sup>, it occupies the I1-I1 region of P<sub>BAD7</sub> and strongly activates  
16 transcription initiation irrespective of the presence of L-arabinose (**Fig. 1b**). We assumed that this  
17 AraC/P<sub>BAD7</sub> system, which behaves as super-activator (always-ON), can be used as a decent switcher  
18 via random mutations in the *araC* gene. This approach is based on our previous observation<sup>4</sup>, where a  
19 surprisingly high fraction (~20%) of the LuxR variant pool, created by random mutagenesis of a super-  
20 activator LuxR mutant<sup>25</sup>, exhibited significantly elevated stringency by moderate destabilisation.

21 We constructed an AraC library using error-prone PCR<sup>26</sup>. Then, we randomly picked 93 variants  
22 and examined their ability to activate the P<sub>BAD7</sub> promoter using a fluorescent reporter in the  
23 presence/absence of L-arabinose. While approximately 50% of the variants behaved as super-  
24 activators, almost 20% of them showed a significantly improved dynamic range in their response (**Fig.**  
25 **1c**). Among the 93 randomly picked variants, we selected five AraC variants that could induce the

1  $P_{BAD7}$  promoter with as high a stringency as the natural AraC/ $P_{BAD}$  system (**Fig. 1d**).

2 Due to their high frequency of emergence, these AraC variants with switching properties might  
 3 be destabilised by mutations so that they become dependent for stabilisation on the interaction with L-  
 4 arabinose, as was the case for LuxR<sup>4</sup>. This high on/off ratio of the AraC/ $P_{BAD7}$  system is not the result  
 5 of optimizing regulator expression<sup>27</sup>. Although randomisation of ribosome binding site significantly  
 6 expands the expression level of wild-type AraC and the maximum output value varied greatly, the  
 7 on/off ratio of these variants barely changed (**Extended Data Fig. 1**).

8 We found that certain AraC variants stringently induced both  $P_{BAD7}$  and  $P_{BAD}$ , indicating a  
 9 moderate decrease in their folding stability without losing the allosteric regulation. A few AraC  
 10 mutants behaved as good switchers only for  $P_{BAD7}$  (**Extended Data Fig. 2**), indicating that the  
 11 mutations might have caused a structural destabilisation, disrupting the allosteric mechanism.

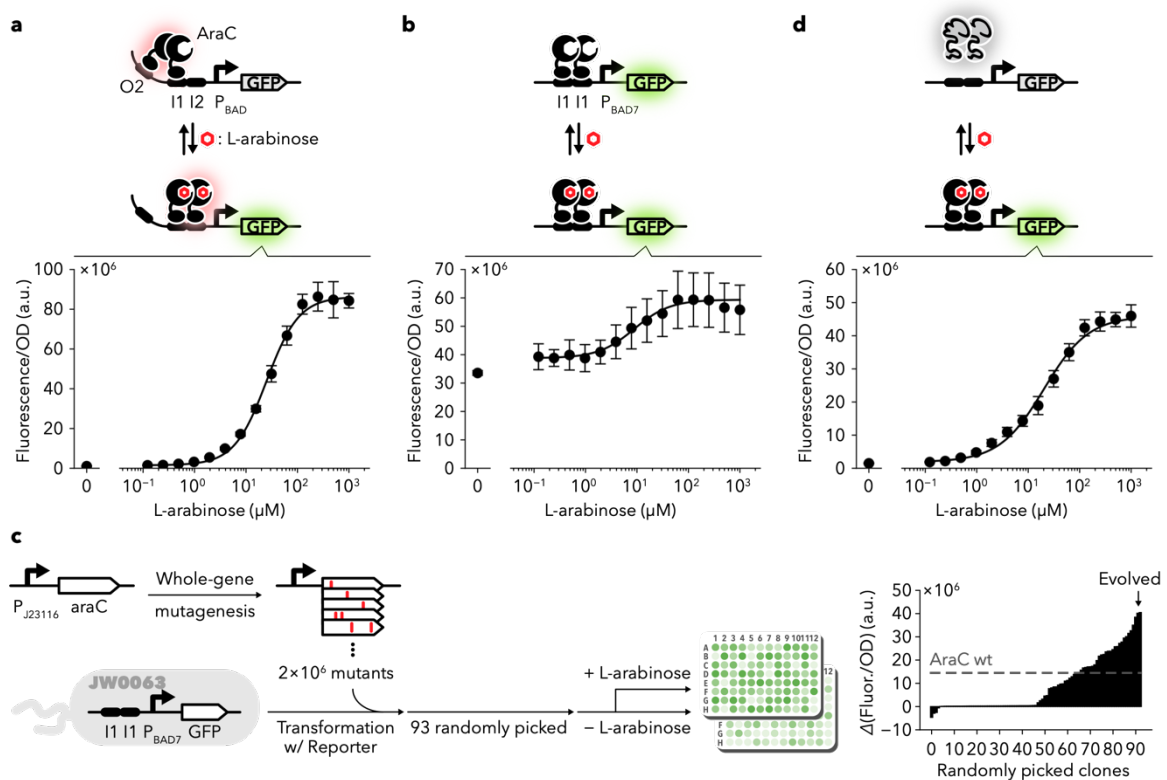

12

13 **Fig. 1 | Arabinose-induction systems via allosteric and BIF modes.** **a**, Natural  
 14 AraC/ $P_{BAD}$  system (allosteric mode). In the absence of L-arabinose, AraC binds to the I1  
 15 and O2 sites to repress transcription. Binding to L-arabinose causes conformational

1 changes in the AraC dimer, which then binds to I1 and I2 sites and activates transcription  
2 from the P<sub>BAD</sub> promoter via interactions with RNA polymerase, inducing the reporter  
3 gene (GFP) expression. **b**, AraC/P<sub>BAD7</sub> system. P<sub>BAD7</sub> promoter contains tandemly  
4 repeated AraC binding site I1, which exhibits the strongest binding affinity for AraC.  
5 AraC always binds to the I1-I1 region and activates the transcription of the reporter gene,  
6 irrespective of the presence of its ligand L-arabinose. **c**, Workflow for the functional  
7 tuning of the AraC/P<sub>BAD7</sub> system. The grey dotted line represents the function of wild-  
8 type AraC. The comparing data in the allosteric and BIF modes is shown in  
9 **Supplementary Fig. 1**. **d**, AraC/P<sub>BAD7</sub> system using AraC mutant (BIF mode). In the  
10 absence of L-arabinose, the AraC mutant cannot fold by itself and fails to activate  
11 transcription. Mutations found in this mutant, Rndm-B2, are provided in  
12 **Supplementary Table 1**. The data shown in **a,b,d** corresponds to the mean  $\pm$  s.d. of three  
13 biological replicates.

## 15 **Evolving agonistic response to antagonist**

16 While agonists trigger the response of sensor/receptor proteins, antagonists inhibit this response.  
17 Although their effects are opposite, the binding of antagonists and agonists to the receptors for their  
18 effects is similar. Since BIF can be used to detect stabilisation by a binding event, BIF-based biosensors  
19 might respond to an antagonist in the same way as to an agonist.

20 The molecular structure of D-fucose, a known antagonist for AraC<sup>28</sup>, resembles that of the cognate  
21 ligand of AraC, L-arabinose, with a methyl group attached to the carbon at position 5 (**Extended Data**  
22 **Fig. 3**). Although D-fucose binds to AraC, it does not trigger a conformational change of AraC, thereby  
23 locking its configuration in the ‘off’ mode (bound to O2 and I1). Indeed, no D-fucose response was  
24 observed in the AraC/P<sub>BAD</sub> system, whereas a slight increase in transcription was observed in the  
25 AraC/P<sub>BAD7</sub> system upon D-fucose binding (**Extended Data Fig. 3**).

1 We investigated the frequency of the AraC variants that are induced by D-fucose from the AraC  
2 library created by random mutagenesis as shown in **Fig.1c (Fig. 2a)**. Here again, approximately 20%  
3 of the 93 randomly picked AraC mutants exhibited a D-fucose response (**Fig. 2b**, lower), which is  
4 consistent with the frequency of switching mutants to L-arabinose (**Fig. 1**). In contrast, only one mutant  
5 was found to induce  $P_{BAD}$  (**Fig. 2b**, upper).

6 We recovered 22 mutants that exhibited a five-fold or greater D-fucose response in the  
7 AraC/ $P_{BAD7}$  context and examined their response to the  $P_{BAD}$  promoter. Most of them failed to induce  
8 transcription at  $P_{BAD}$  (**Fig. 2c**). Sequence analysis of the D-fucose-dependent  $P_{BAD}$  activator AraC  
9 variant AraC carried I46V mutation, which might be responsible for the allosteric response to D-fucose.  
10  $P_{BAD7}$  behaved as a super-activator, i.e. wild-type-like (**Extended Data Fig. 4**), indicating this mutant  
11 acquired novel conformational changes for D-fucose without compromising stability.

12 Genotyping D-fucose-responsive mutants revealed amino acid substitutions with little bias and  
13 without any mutational hot spots (**Fig. 2d and Extended Data Fig. 5**). We used the FoldX algorithm<sup>29</sup>  
14 to predict stability changes ( $\Delta\Delta G$ ) due to mutations. We found that the stability change for all 55 unique  
15 mutations was distributed with a peak value of 1 kcal/mol and many mutations tended to decrease the  
16 stability (**Fig. 2e**, upper). Furthermore, the data for each mutant showed that most of the mutants were  
17 highly destabilised (**Fig. 2e**, lower). Since the binding affinity of AraC for D-fucose is similar to that  
18 for L-arabinose (apparent  $K_d$  of  $6 \times 10^{-3}$  M)<sup>30</sup>, it might have acquired its agonist response by  
19 moderately reducing its structural stability through random amino acid mutations to become a binding-  
20 induced folder. In summary, binding-induced stabilisation is unique because it does not distinguish  
21 between agonists and antagonists. Moreover, it allows the development of rapid antagonist-responsive  
22 sensors with significantly higher frequency (in this case, 20-fold) without the need to reconstruct the  
23 allosteric mechanism.

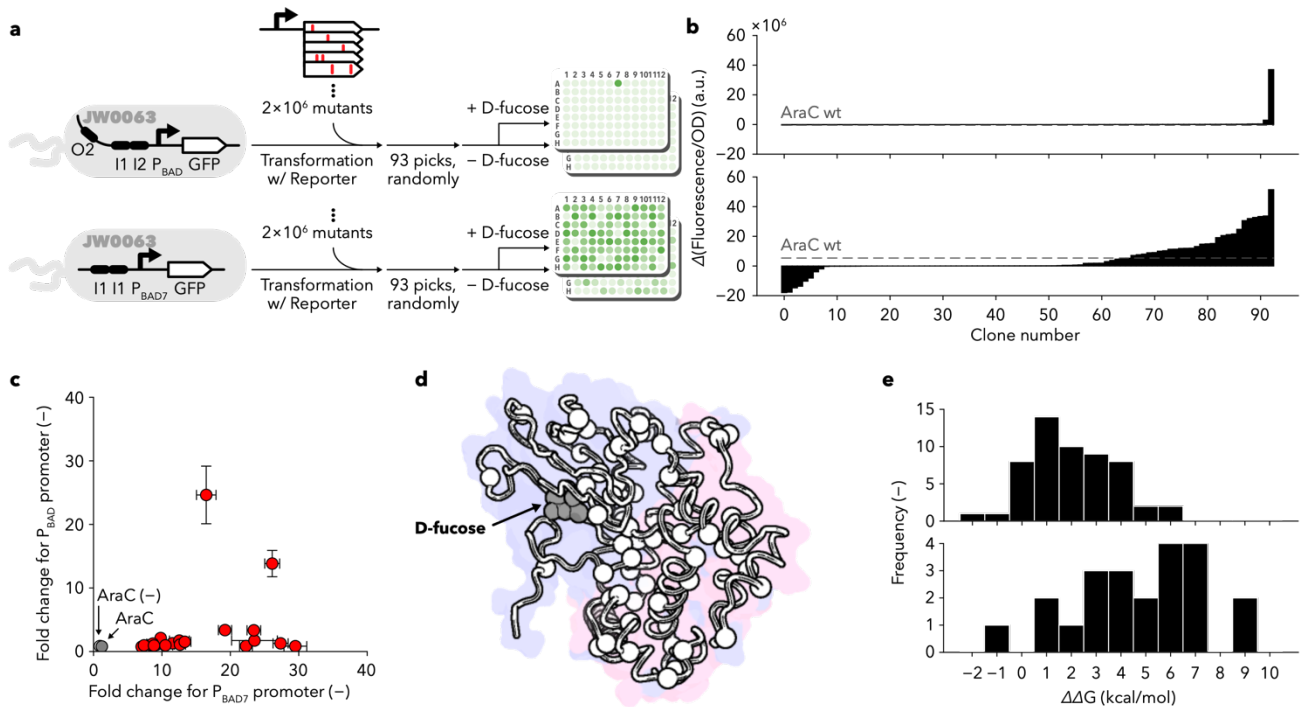

**Fig. 2 | Emergence of antagonist-responsive AraC mutants.** **a**, The experimental workflow for searching for D-fucose responders in allosteric and BIF modes. **b**, Fitness landscapes of AraC for the allosteric (upper) and BIF (lower) modes, respectively. The functions of the 93 AraC mutants and the wild type are represented by the solid black and dotted grey lines, respectively. These experiments were performed as a single measurement. **c**, Comparison of the switching modes of the 22 mutants showing  $\geq 5$ -fold response to D-fucose in AraC/ $P_{BAD7}$  (BIF mode) (as shown in c and Supplementary Fig. 2). Each value corresponds to the mean  $\pm$  s.d. of three biological replicates. Red, AraC mutants; grey, wild-type AraC; white, AraC (-). **d**, Structural mapping of the mutations found in the 22 D-fucose responsive mutants based on superposition of the structure predicted by AlphaFold2 (ID: AF-P0A9E0-F1-model\_v2) and the crystal structure of the ligand binding domain of AraC bound to D-fucose (PDB ID: 2aac). The white spheres indicate the alpha-carbons of the amino acids where the mutations were introduced. The blue and red backgrounds represent the sugar-binding and DNA-binding domains, respectively. **e**, Predicted stability effects of 55 individual mutations (upper panel) found

1 in the 22 mutants (lower panel). The Gibbs energy change ( $\Delta\Delta G$ ) was calculated by  
2 FoldX. The data are presented in histograms with 1 kcal/mol intervals, ranging from  $-2$   
3 to 10 kcal/mol.

4

### 5 **Searching for novel sensor functions**

6 Because redesigning allosteric mechanisms is not required, we hypothesised that there is a higher  
7 probability that sensors based on binding-induced stabilisation can perform newer and more diverse  
8 functions than allosteric sensors.

9 Unlike D-fucose (antagonist), D-galactose does not bind to AraC<sup>31</sup>. Structural analysis suggested  
10 that the sugar-binding pocket formed by F15, M42 and I46 on AraC fits the methyl group of D-fucose  
11 (**Fig. 3a**), but fails to accommodate the bulky C5-hydroxymethyl group of the D-galactose<sup>32</sup>.

12 To obtain AraC mutants that bind and respond to D-galactose, we simultaneously randomised  
13 these three amino acids, F15, M42 and I46. From the 93 randomly picked AraC variants, we found  
14 three D-galactose-responsive mutants (**Extended Data Fig. 6a**), which were pooled and subjected to  
15 random mutagenesis by error-prone PCR. Again, among the 93 mutants randomly selected from the  
16 mutant pool, one exhibited a D-galactose response with a decent stringency (**Extended Data Fig. 6b**).  
17 Note that, this second-generation mutant (Gal2-1) is just the best among the 93 randomly selected  
18 variants.

19 All four mutants with measurable D-galactose responses exhibited an always-off behaviour  
20 toward the  $P_{BAD}$  promoter (**Fig. 3b**). Thus, any combinatorial mutations that conferred D-galactose  
21 response in the BIF mode (**Fig. 3c**) did not invoke the allostery. Also, it indicates that the evolution of  
22 AraC as a D-galactose responder requires additional mutations that establish the intra-molecular  
23 interactions needed for allosteric switching.



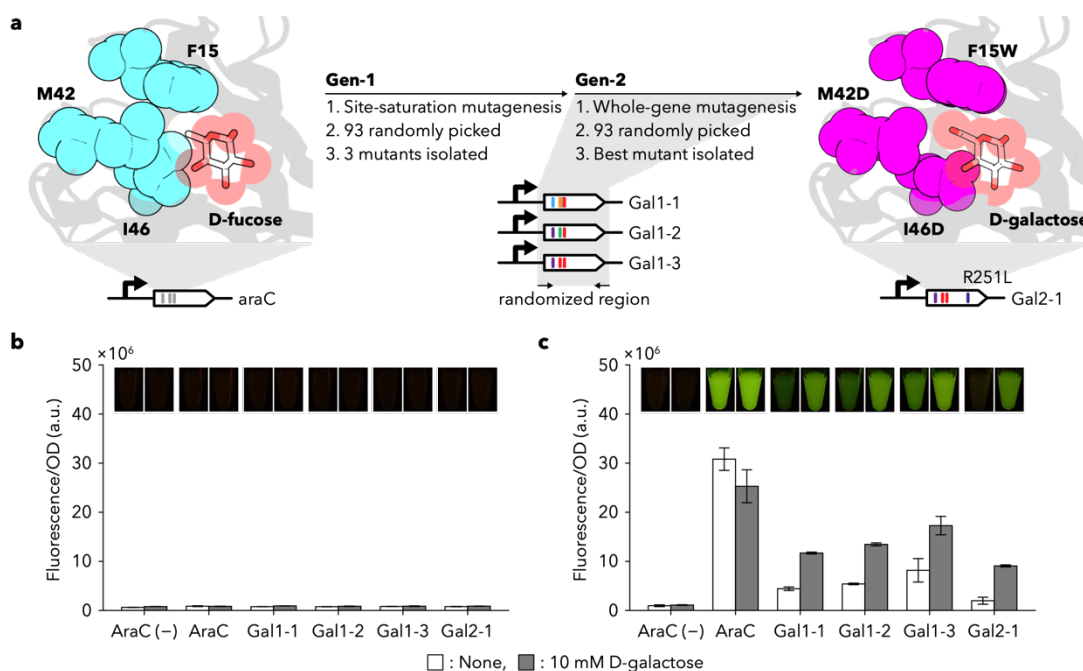

**Fig. 3 | Directed evolution of AraC to D-galactose sensor.** **a**, The three residues in contact with the methyl group of D-fucose (shown as a stick) were simultaneously randomised and selected for fluorescence in the presence of D-galactose. Three positive mutants were pooled and subjected to whole-gene random mutagenesis for increased stringency, leading to the isolation of quadruple mutants AraC<sub>F15W, M42D, I46D, R251L</sub>. **b,c**, Response of AraC and its variants to D-galactose in allosteric (**b**) and BIF modes (**c**), respectively. Each value corresponds to the mean  $\pm$  s.d. of three biological replicates. After dispensing 200  $\mu$ L of cell culture into 1.5 mL microtubes, fluorescent images were captured using Gel Ninja. Sequences found in D-galactose-responsive mutants are provided in **Supplementary Table 2**.

AraC is one of the most extensively engineered sensor proteins. Seminal work by Cirino and colleagues created AraC variants that can allosterically respond to D-arabinose<sup>33</sup>, mevalonic acid<sup>34</sup>, triacetic acid, lactone<sup>35,36</sup>, ectoin<sup>37</sup>, vanillin<sup>38</sup>, salicylic acid<sup>38</sup> and orsellinic acid<sup>39</sup> by engineering the binding specificity of AraC. This remarkable set of functions was achieved via computational design and ultra-high throughput FACS sorting. The frequency of the emergence of these mutants approached

1  $10^{-6}$ .

2 Based on the available literature, we selected a salicylic acid-responsive AraC mutant, named  
3 Sal4 (ref.<sup>38</sup>), which was obtained through FACS selection at a frequency of  $10^{-6}$  from a large library  
4 after simultaneously randomising five ligand-binding residues. Sal4 has five amino acid substitutions  
5 P8V, T24I, H80G, Y82L and H93R (**Figs. 4a and c**). We created 32 AraC variants with all  
6 combinations of these five mutations ( $n = 2^5$ ) and examined the changes in fluorescence upon the  
7 addition of salicylic acid, both in the allosteric and the BIF modes (**Figs. 4b, d and e, Extended Data**  
8 **Fig. 7a**).

9 In the allosteric mode (using  $P_{BAD}$  promoter activity as the readout), only two variants, Sal4  
10 (11111) and a quadruple mutant (10111), exhibited a salicylic acid response (**Fig. 4d**), with a needle-  
11 like fitness landscape. Contrastingly, most of the same variants, including the single mutant (P8V,  
12 10000), exhibited significant responses to salicylic acid in the BIF mode (using  $P_{BAD7}$  promoter activity  
13 as the readout) (**Fig. 4e**). This demonstrates that although the mutations in the ligand-binding pocket  
14 of AraC facilitated novel binding mechanisms for salicylic acid while losing to bind L-arabinose  
15 (Extended Data Figs. 7b and 8), most of them did not exhibit allosteric activation of AraC. Thus, the  
16 success rate of developing new sensor functions can be dramatically increased by adopting binding-  
17 induced stabilisation.

18 Interestingly, Sal4, which was originally isolated during the screening for salicylic acid-induced  
19  $P_{BAD}$  activation, exhibited a higher signal output and stringency with  $P_{BAD7}$  activation (BIF mode).  
20 Therefore, the five mutations necessary for salicylic acid response (in Sal4) could significantly  
21 destabilise AraC, and possibly make it a salicylic acid-induced folder (**Figs. 4h and i**). If salicylic acid-  
22 induced folding stabilisation applies equally to the active (binding to the I1–I2 sites) and inactive  
23 (binding to the I1–O2 sites) forms (**Figs. 4f and g**), Sal4 still needs to evolve to acquire an optimal  
24 allosteric response to salicylic acid.

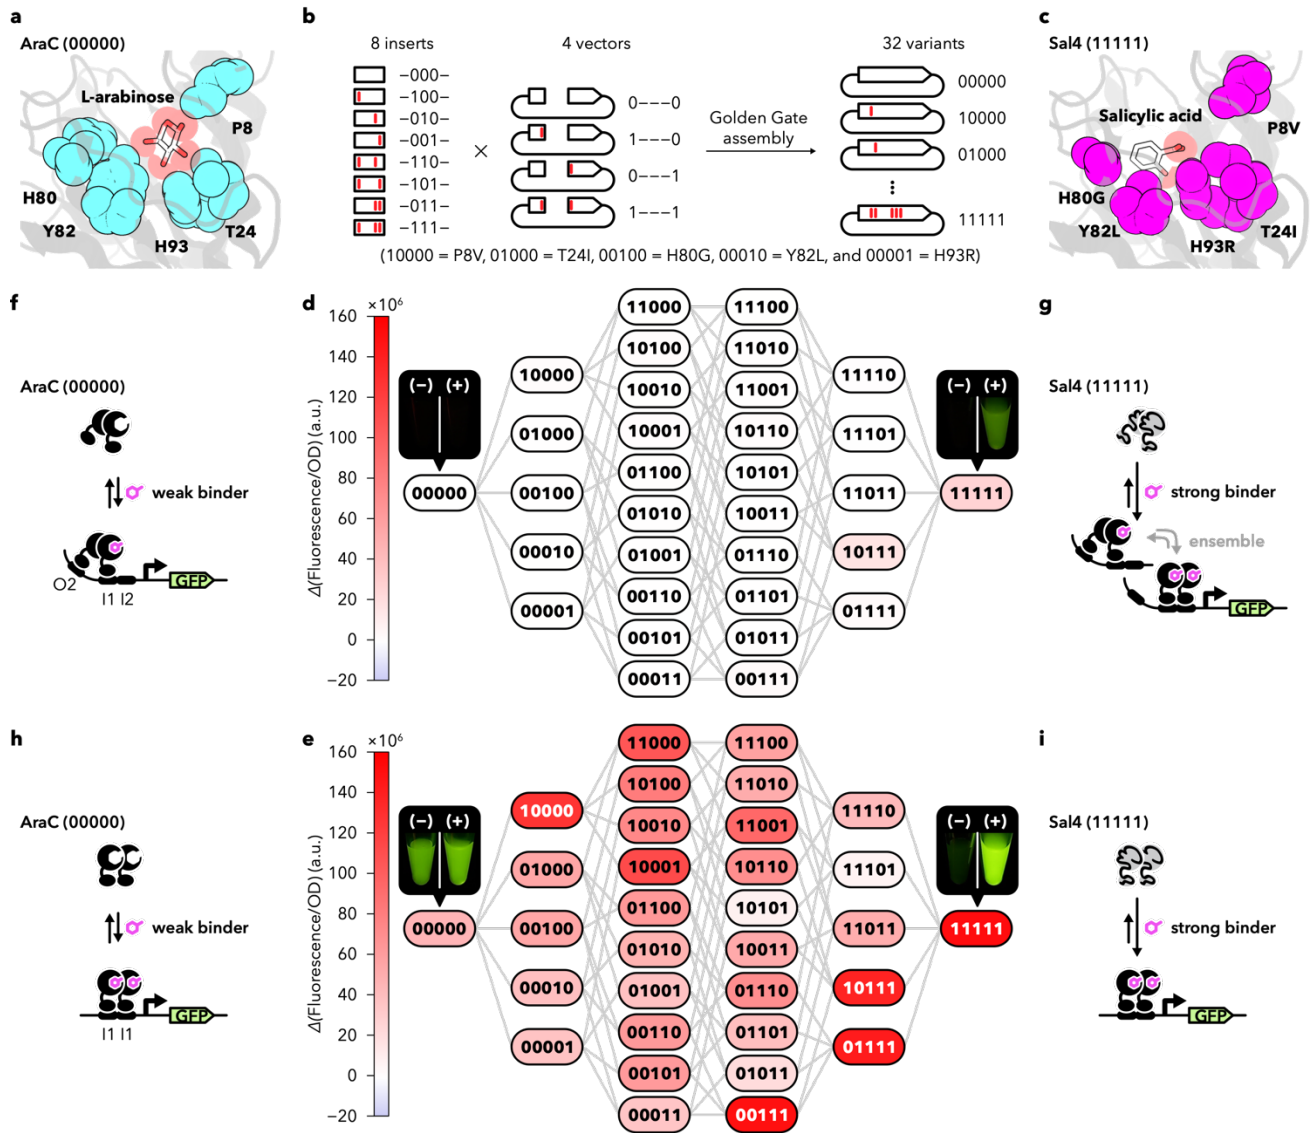

**Fig. 4 | Comparison of the evolvability of salicylic acid response in allosteric and BIF modes.** **a**, Residues targeted for generating Sal4. Five residues (cyan spheres) were subjected to mutagenesis. L-arabinose is shown as the stick and translucent sphere. The structure of AraC with L-arabinose was obtained from PDB ID 2arc. **b**, Construction of 32 AraC variants. Eight-insert DNA and four-vector DNA variants generated by PCR were subjected to Golden Gate assembly in all combinations to construct 32 AraC variant-expression plasmids. **c**, Binding pocket of Sal4 with five substitutions (shown as magenta spheres). Salicylic acid is shown as a stick and translucent sphere. The model structure of AraC with salicylic acid was generated using PyMOL and AutoDock vina.

1 **d,e**, Responses of 32 AraC mutants to salicylic acid in allosteric and BIF modes,  
2 respectively. AraC and Sal4 alleles are indicated by 0 and 1, respectively. The mean of  
3 the  $\Delta(\text{Fluorescence}/\text{OD})$  of three parallel experiments are shown. After dispensing 200  
4  $\mu\text{L}$  of cell culture into 1.5 mL microtubes, the fluorescent images were captured using a  
5 Gel Ninja. Quantitative fluorescence measurement and standard deviations are provided  
6 in **Supplementary Table 3**. An alternative representation is shown in **Supplementary**  
7 **Fig. 3**. Switching mechanisms of **(f,g)** AraC and Sal4 at  $P_{\text{BAD}}$  promoter and **(h,i)** at  $P_{\text{BAD7}}$   
8 promoter.

9

### 10 **Cooperation of BIF and allosteric modes**

11 Antagonists competitively inhibit the allosteric response to ligands and agonists. When L-arabinose  
12 (AraC ligand) and D-fucose (AraC antagonist) are used as two input signals, the natural **AraC/ $P_{\text{BAD}}$**   
13 system is expected to behave as the NIMPLY gate; transcriptional activation is observed only in the  
14 presence of L-arabinose and absence of D-fucose (**Fig. 5a**). Contrastingly, AraC/ $P_{\text{BAD7}}$  system simply  
15 detects binding-induced stabilisation (**Fig. 1**) rather than the conformational changes associated with  
16 ligand binding. Hence, it does not distinguish between agonists and antagonists (**Fig. 2**) and is expected  
17 to behave as the OR gate that is activated in the presence of either L-arabinose or D-fucose or both.  
18 Indeed, using a plasmid with the RFP gene under the  $P_{\text{BAD7}}$  promoter, we confirmed its OR gate  
19 behaviour (**Fig. 5b**). Therefore, the same AraC variant can control the expression of two different  
20 promoters using completely different logic operations.

21 We found that genes controlled by  $P_{\text{BAD}}$  (GFP) and  $P_{\text{BAD7}}$  (RFP) can coexist in the same cell and  
22 both promoters can be activated simultaneously and independently by the same AraC variant acting as  
23 a selective NIMPLY-OR converter (**Fig. 5c**). To our knowledge, there are no reports of a dual-output  
24 logic gate employing a single transcription factor.

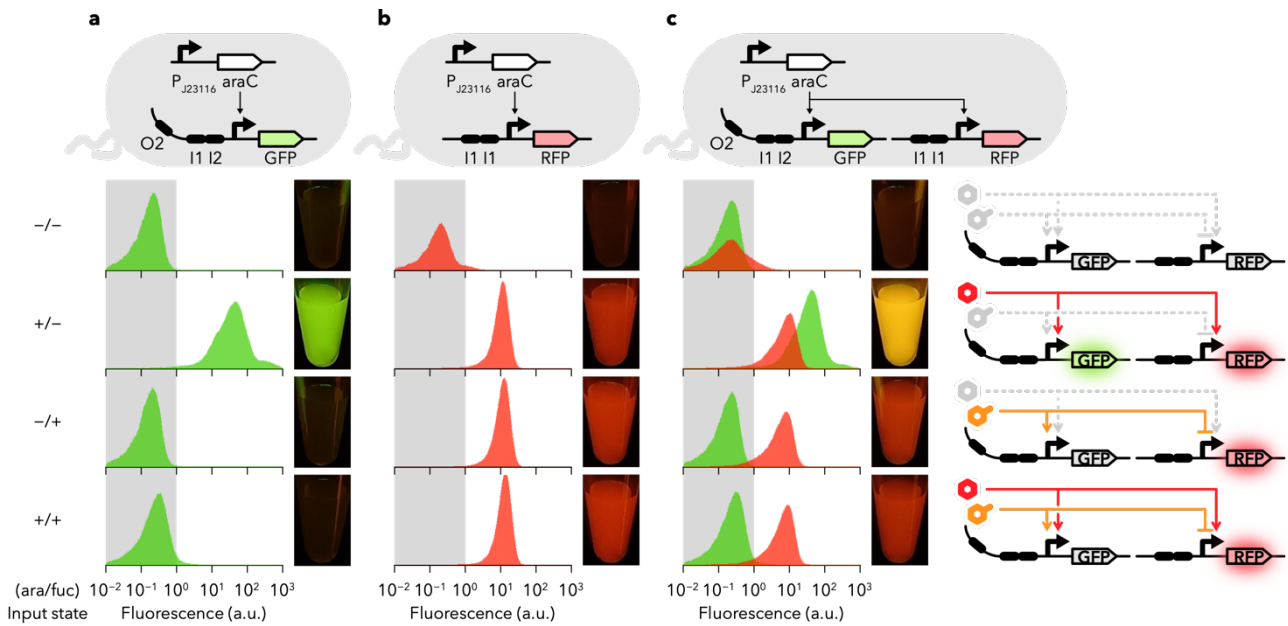

**Fig. 5 | A single AraC variant behaves as a ‘selective NIMPY-OR converter’.** a,b,c,

Cell populations and culture images harbouring AraC<sub>G1P1G4</sub>/P<sub>BAD</sub>, AraC<sub>G1P1G4</sub>/P<sub>BAD7</sub> and

AraC<sub>G1P1G4</sub>/P<sub>BAD</sub>/P<sub>BAD7</sub> systems, respectively. All logic functions were tested in the

presence or absence of 1 mM L-arabinose or D-fucose. From top to bottom: no addition,

L-arabinose only, D-fucose only and both. Green and red histograms indicate green and

red fluorescence, respectively. Grey areas indicate no significant fluorescence, i.e. “off”

state. Representative cell populations from four independent experiments are shown.

Further details are provided in **Extended Data Fig. 9**.

### Integration of allosteric and BIF modes

We found that most of the AraC mutants activated the P<sub>BAD7</sub> promoter at lower concentrations of L-

arabinose than the P<sub>BAD</sub> promoter (**Extended Data Fig. 2**). In the case of the AraC mutant G1P2G7,

P<sub>BAD7</sub> response was five times more sensitive to arabinose ( $EC_{50} = 21 \mu\text{M}$ ) than that of P<sub>BAD</sub> ( $EC_{50} =$

$99 \mu\text{M}$ ) (**Fig. 6a**), possibly due to the difference in the operator sites that AraC acts on. In the P<sub>BAD</sub>

promoter, the binding of the AraC dimer to the I1-O2 sites is 18 times stronger than to the I1-I2 sites<sup>18</sup>.

The apo form of AraC is selectively stabilised by O2 binding, thereby decreasing the extent of ligand

1 (arabinose)-induced stabilisation. Hence, arabinose-induced conformational changes and the shifting  
2 to I1-I2 sites of AraC are shifted toward a higher concentration of arabinose, which does not represent  
3 the equilibrium between L-arabinose and AraC in the absence of operators. Contrastingly, the  $P_{BAD7}$   
4 site lacks the O2 site, therefore, its arabinose response might directly reflect the equilibrium between  
5 L-arabinose and AraC.

6 AraC mutants respond to each promoter, which can be independently regulated within the same  
7 cell (**Fig. 5**), with different detection limits. Band-pass filter (BPF) is a circuit used to monitor whether  
8 a certain substance exists within the correct concentration range. Using the synthesis of morphogens  
9 as the output, BPF can be applied for pattern formation at a macroscopic scale. BPF can be constructed  
10 by genetically integrating a low- and high-pass filter (LPF and HPF) with different detection limits for  
11 the input molecule<sup>40</sup>. The mechanism of BPFs has been shown to include the simultaneous detection  
12 of various concentrations of input molecules by receiver proteins and the expression of several  
13 regulatory proteins, exploiting the differences in affinity of these regulators to DNA. Here, at least two  
14 or more transcription factors and/or polymerases are required with the receiver protein<sup>41</sup>.

15 We thought it was feasible to integrate the outputs from the  $P_{BAD}$  and  $P_{BAD7}$  promoters to develop  
16 a BPF with fewer components (**Fig. 6b**). Therefore, to integrate the outputs of both  $P_{BAD}$  and  $P_{BAD7}$   
17 promoters, the lambda cI repressor gene was placed under the  $P_{BAD}$  promoter and its binding site, cIO,  
18 was inserted into the core region of the  $P_{BAD7}$  promoter (called the  $P_{BAD7/cIO}$  promoter, Extended Data  
19 Table 1) to invert the output from  $P_{BAD}$  promoter.

20 As expected, the resultant genetic circuit behaved as a BPF (**Figs. 6d and e**). Compared to the  
21 previously reported BPFs, this BPF circuit is unique as a single sensor protein, AraC, plays a dual role  
22 of an LPF and an HPF. The most remarkable feature of this BPF is that it is constructed by integrating  
23 the BIF and allosteric modes of AraC. Here, D-fucose agonises the BIF component, but antagonises  
24 the allosteric component (**Fig. 6c**). Consequently, this BPF circuit continuously transitions from BPF  
25 to LPF with increasing concentrations of D-fucose (**Figs. 6d and e**).

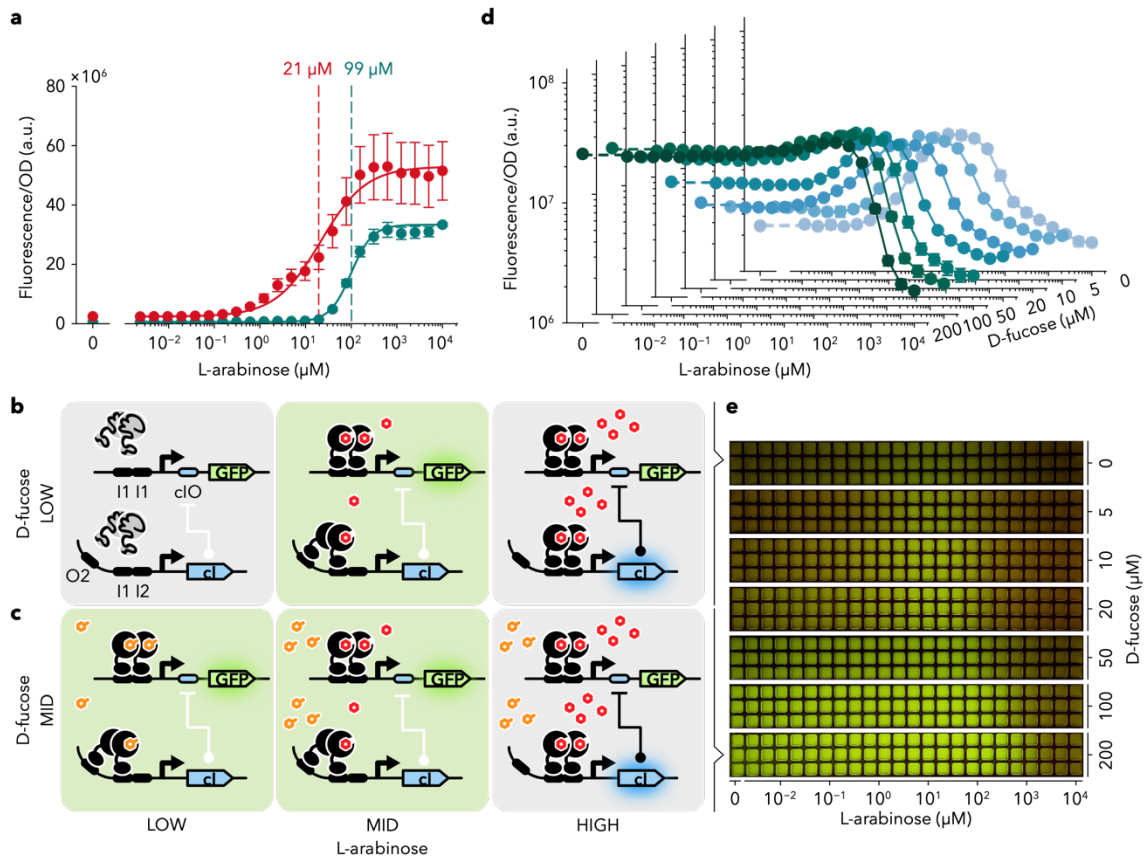

**Fig. 6 | Integration of BIF and inverted allosteric output yield tuneable band-pass**

**filter. a**, Dose response of AraC<sub>G1P2G7</sub> to L-arabinose in allosteric (green) and BIF (red)

modes. The EC<sub>50</sub> values for both modes were determined by the Hill equation. **b**, Design

of band-pass filter. At low L-arabinose concentrations, both promoters are inactive due

to the low stability of AraC. At moderate arabinose concentrations, stabilised AraC

activates transcription at the P<sub>BAD7/cIO</sub> promoter, while, at high arabinose concentrations,

it also activates the P<sub>BAD</sub> promoter to express the cI protein, which strongly represses

transcription at the P<sub>BAD7/cIO</sub> promoter. **c**, Design of transition to a low-pass filter: The

presence of D-fucose further stabilises AraC and slightly lowers the switching threshold

of the arabinose high-pass filter. D-fucose antagonises the P<sub>BAD</sub> (allosteric) gene

expression, thereby elevating the switching threshold of the low-pass filter. Consequently,

the bandwidth of this BPF circuit is largely expanded. **d**, *E. coli* performances that

installed the variable filter circuit. **e**, Images of cell functions. After dispensing 100  $\mu\text{L}$

1 of cell cultures used in **c** into 384-well shallow plates, fluorescent images were captured  
2 using a Gel Ninja. In **a** and **d**, the data corresponds to the mean  $\pm$  s.d. of three biological  
3 replicates.

4

## 5 **Discussion**

6 Sensors operating on the BIF principle are expected to have a high probability to invent new sensor  
7 functions, as they can act as a molecular switch only by fabricating interface that binds to the target  
8 molecules. To test this hypothesis, it is necessary to allow BIF-mode and allosteric mode to coexist in  
9 a single sensor protein, enabling the direct comparison of the frequency of new functions in the same  
10 mutant library of the protein. For this purpose, we employed a promoter configuration ( $P_{BAD7}$ ) in which  
11 AraC effectively acts as a super-activator (non-switch). Upon de-stabilization by mutation, AraC  
12 rapidly acquired BIF-mode while maintaining its original function as an allosteric sensor ( $P_{BAD}$ ). This  
13 enabled us, for the first time, an experimental comparison of the evolutionary capacities (capacities to  
14 invent new sensory functions) of AraC operating in BIF-mode and in allosteric modes. It revealed that  
15 AraC evolves new target response in remarkably high frequency, at least for the three different targets,  
16 D-fucose (natural antagonist of AraC; **Fig. 2**), D-galactose (non-binder; **Fig. 3**), and salicylic acid  
17 (irrelevant compound; **Fig. 4**).

18 Originally, BIF<sup>1-4</sup> was proposed as an attractive approach that enables the rapid development of  
19 molecular switches and sensors without the necessity for laborious task of designing binding-induced  
20 allosteric modulation. Proteins are only marginally stable in nature, and folding energy can be  
21 cancelled by introducing a handful of mutations. As a phenomenon, BIF has been recognised for  
22 decades: many proteins are known to be better purified or crystallised as complexes with their ligands,  
23 substrates, or inhibitors<sup>42-45</sup>, and variants of sensory proteins behaving as BIFs have been described in  
24 mutational studies<sup>46-49</sup>. In our recent work, almost 20% of the non-switching variants of quorum sensor  
25 protein LuxR turned into stringent switchers upon random mutagenesis<sup>4</sup>. This surprisingly high



1 frequency of emergence of switchers was also observed with AraC (**Fig. 1**). Thus, any protein can be  
2 readily transformed into a BIF through random mutation, highly accessible resource during evolution.

3 The newly added sensory function of AraC (non-allosteric regulation of  $P_{BAD7}$ ) is not only fully  
4 compatible with, but also qualitatively different from the original function (allosteric regulation of  
5  $P_{BAD}$ ). As far as we known, this is the first report on a single-protein machinery that can operate two  
6 distinct regulatory behaviours. First, the sensors operating in BIF-mode are the visualizers of the  
7 stabilisation upon target binding, and therefore are unique in that they do not distinguish between  
8 agonists and antagonists. Secondly, sensitivity of BIF-sensors can be freely modulated (**Extended**  
9 **Data Fig. 2**), by tuning either of the target affinity by mutation or by changing operator configurations.  
10 Thus differentiated two sensory functions can be integrated into unique circuitry behaviours like a  
11 selective NIMPLY-OR converter (**Fig. 5**) and band pass filter with bandwidth tuning function (**Fig. 6**).  
12 Proteomic analysis has unveiled that proteins interact with a surprising number of metabolites and  
13 other proteins, which have non-negligible effects on their stability<sup>50,51</sup>. Binding-induced stabilisation  
14 enables all such interactions to be active participants in the decision making of the behaviours of  
15 physiological network.

16 Mutation drives protein evolution whilst simultaneously being the primary evolutionary  
17 constraint. Protein engineers are striving to obtain adaptive mutations that bestow new functions,  
18 whilst avoiding the destabilising effects of mutations<sup>15-21</sup>. Chaperone over-expression<sup>52</sup> and stabilising  
19 mutations<sup>53,54</sup> have been proven to be highly effective in mitigating this destabilisation effect. This  
20 study highlights a unique scenario in which mutations' destabilising impact may accelerate the  
21 evolution of protein function. Well-evolved allosteric enzymes frequently acquire BIF properties due  
22 to mutational instability. This makes the newly invented novel target binding selectable trait. Given  
23 that binding-induced folders are frequently emerged from complex allosteric protein machinery (**Fig.**  
24 **1**), it is tempting to speculate that the new binding properties are generated first in the non-allosteric  
25 mode, leading to sensors that exhibit binding-induced conformational changes and finally resulting in

1 a mature allosteric sensor. These evolutionary intermediates may subsequently be upgraded to full-  
2 fledged allosteric sensors, driven by the evolutionary requirement for selectivity and/or economic  
3 demands in protein biogenesis. Exploring through BIF will also enable the development of novel  
4 biosensors tailored for the ever-increasing repertoire of molecules, either discovered in nature or  
5 created by chemists.

6

1 **Main references**

- 2 1. Oh, K. J., Cash, K. J. & Plaxco, K. W. Beyond molecular beacons: optical sensors based on  
3 the binding-induced folding of proteins and polypeptides. *Chem. Eur. J.* **15**, 2244–2251  
4 (2009).
- 5 2. Kohn, J. E. & Plaxco, K. W. Engineering a signal transduction mechanism for protein-based  
6 biosensors. *Proc. Natl. Acad. Sci. U. S. A.* **102**, 10841–10845 (2005).
- 7 3. Feng, J. *et al.* A general strategy to construct small molecule biosensors in eukaryotes. *Elife* **4**,  
8 e10606 (2015).
- 9 4. Kimura, Y., Kawai-Noma, S., Saito, K. & Umeno, D. Directed evolution of the stringency of  
10 the LuxR *Vibrio fischeri* quorum sensor without OFF-state selection. *ACS Synth. Biol.* **9**, 567–  
11 575 (2020).
- 12 5. Blackmore, N. J. *et al.* Three sites and you are out: ternary synergistic allosteric controls  
13 aromatic amino acid biosynthesis in *Mycobacterium tuberculosis*. *J. Mol. Biol.* **425**, 1582–1592  
14 (2013).
- 15 6. He, X., Ni, D., Lu, S. & Zhang, J. Characteristics of allosteric proteins, sites, and modulators.  
16 *Adv. Exp. Med. Biol.* **1163**, 107–139 (Springer, 2019).
- 17 7. Mathy, C. J. P. & Kortemme, T. Emerging maps of allosteric regulation in cellular networks.  
18 *Curr. Opin. Struct. Biol.* **80**, 102602 (2023).
- 19 8. Salgado, H. *et al.* RegulonDB v12.0: a comprehensive resource of transcriptional regulation in  
20 *E. coli* K-12. *Nucleic Acids Res.* **1**, 13–14 (2013).
- 21 9. Nussinov, R. & Tsai, C.-J. The different ways through which specificity works in orthosteric  
22 and allosteric drugs. *Curr. Pharm. Des.* **18**, 1311–1316 (2012).
- 23 10. Galstyan, V. & Phillips, R. Allostery and kinetic proofreading. *J. Phys. Chem. B* **123**, 10990–  
24 11002 (2019).
- 25 11. Ambroggio, X. I. & Kuhlman, B. Design of protein conformational switches. *Curr. Opin. Struct.*

- 1        *Biol.* **16**, 525–530 (2006).
- 2    12.    Praetorius, F. *et al.* Design of stimulus-responsive two-state hinge proteins. *Science* **381**, 754–  
3        760 (2023).
- 4    13.    Krappmann, S., Lipscomb, W. N. & Braus, G. H. Coevolution of transcriptional and allosteric  
5        regulation at the chorismate metabolic branch point of *Saccharomyces cerevisiae*. *Proc. Natl.*  
6        *Acad. Sci. U. S. A.* **97**, 13585–13590 (2000).
- 7    14.    Alm, E., Huang, K. & Arkin, A. The evolution of two-component systems in bacteria reveals  
8        different strategies for niche adaptation. *PLoS Comput. Biol.* **2**, e143 (2006).
- 9    15.    Shortle, D., Stites, W. E. & Meeker, A. K. Contributions of the large hydrophobic amino acids  
10        to the stability of staphylococcal nuclease. *Biochemistry* **29**, 8033–8041 (1990).
- 11    16.    Green, S. M., Meeker, A. K. & Shortle, D. Contributions of the polar, uncharged amino acids to  
12        the stability of staphylococcal nuclease: evidence for mutational effects on the free energy of  
13        the denatured state. *Biochemistry* **31**, 5717–5728 (1992).
- 14    17.    Serrano, L., Kellis, J. T., Cann, P., Matouschek, A. & Fersht, A. R. The folding of an enzyme:  
15        II. Substructure of barnase and the contribution of different interactions to protein stability. *J.*  
16        *Mol. Biol.* **224**, 783–804 (1992).
- 17    18.    Meeker, A. K., Garcia-Moreno, B. & Shortle, D. Contributions of the ionizable amino acids to  
18        the stability of staphylococcal nuclease. *Biochemistry* **35**, 6443–6449 (1996).
- 19    19.    Chen, J. & Stites, W. E. Energetics of side chain packing in staphylococcal nuclease assessed  
20        by systematic double mutant cycles. *Biochemistry* **40**, 14004–14011 (2001).
- 21    20.    Holder, J. B. *et al.* Energetics of side chain packing in staphylococcal nuclease assessed by  
22        exchange of valines, isoleucines, and leucines. *Biochemistry* **40**, 13998–14003 (2001).
- 23    21.    Tokuriki, N., Stricher, F., Schymkowitz, J., Serrano, L. & Tawfik, D. S. The stability effects of  
24        protein mutations appear to be universally distributed. *J. Mol. Biol.* **369**, 1318–1332 (2007).
- 25    22.    Guzman, L.-M., Belin, D., Carson, M. J. & Beckwith, J. Tight regulation, modulation, and high-

- 1 level expression by vectors containing the arabinose P<sub>BAD</sub> promoter. *J. Bacteriol.* **177**, 4121–  
2 4130 (1995).
- 3 23. Reeder, T. & Schleif, R. AraC protein can activate transcription from only one position and  
4 when pointed in only one direction. *J. Mol. Biol.* **231**, 205–218 (1993).
- 5 24. Seabold, R. R. & Schleif, R. F. Apo-AraC Actively Seeks to Loop. *J. Mol. Biol.* **278**, 529–538  
6 (1998).
- 7 25. Kimura, Y., Tashiro, Y., Saito, K., Kawai-Noma, S. & Umeno, D. Directed evolution of *Vibrio*  
8 *fischeri* LuxR signal sensitivity. *J. Biosci. Bioeng.* **122**, 533–538 (2016).
- 9 26. Kimura, Y. & Umeno, D. Directed evolution of transcriptional switches using dual-selector  
10 systems. in *Methods Enzymol.* **644**, 191–207 (2020).
- 11 27. Wang, B., Barahona, M. & Buck, M. Amplification of small molecule-inducible gene  
12 expression via tuning of intracellular receptor densities. *Nucleic Acids Res.* **43**, 1955–1964  
13 (2015).
- 14 28. Doyle, M. E., Brown, C., Hogg, R. W. & Helling, R. B. Induction of the *ara* operon of  
15 *Escherichia coli* B/r. *J. Bacteriol.* **110**, 56–65 (1972).
- 16 29. Guerois, R., Nielsen, J. E. & Serrano, L. Predicting changes in the stability of proteins and  
17 protein complexes: a study of more than 1000 mutations. *J. Mol. Biol.* **320**, 369–387 (2002).
- 18 30. Wilcox, G. The interaction of L-arabinose and D-fucose with AraC protein. *J. Biol. Chem.* **249**,  
19 6892–6894 (1974).
- 20 31. Ghosh, M. & Schleif, R. F. Biophysical evidence of arm-domain interactions in AraC. *Anal.*  
21 *Biochem.* **295**, 107–112 (2001).
- 22 32. Soisson, S. M., MacDougall-Shackleton, B., Schleif, R. & Wolberger, C. The 1.6 Å crystal  
23 structure of the AraC sugar-binding and dimerization domain complexed with D-fucose. *J. Mol.*  
24 *Biol.* **273**, 226–237 (1997).
- 25 33. Tang, S. Y., Fazelinia, H. & Cirino, P. C. AraC regulatory protein mutants with altered effector

- 1 specificity. *J. Am. Chem. Soc.* **130**, 5267–5271 (2008).
- 2 34. Tang, S. Y. & Cirino, P. C. Design and application of a mevalonate-responsive regulatory protein.  
3 *Angew. Chem. Int. Ed.* **50**, 1084–1086 (2011).
- 4 35. Tang, S. Y. *et al.* Screening for enhanced triacetic acid lactone production by recombinant  
5 *Escherichia coli* expressing a designed triacetic acid lactone reporter. *J. Am. Chem. Soc.* **135**,  
6 10099–10103 (2013).
- 7 36. Frei, C. S. *et al.* Analysis of amino acid substitutions in AraC variants that respond to triacetic  
8 acid lactone. *Protein Sci.* **25**, 804–814 (2016).
- 9 37. Chen, W. *et al.* Design of an ectoine-responsive AraC mutant and its application in metabolic  
10 engineering of ectoine biosynthesis. *Metab. Eng.* **30**, 149–155 (2015).
- 11 38. Frei, C. S., Qian, S. & Cirino, P. C. New engineered phenolic biosensors based on the AraC  
12 regulatory protein. *Protein Eng. Des. Sel.* **31**, 213–220 (2018).
- 13 39. Wang, Z. *et al.* Engineering sensitivity and specificity of AraC-based biosensors responsive to  
14 triacetic acid lactone and orsellinic acid. *Protein Eng. Des. Sel.* **33**, gzaa027 (2020).
- 15 40. Basu, S., Gerchman, Y., Collins, C. H., Arnold, F. H. & Weiss, R. A synthetic multicellular  
16 system for programmed pattern formation. *Nature* **434**, 1130–1134 (2005).
- 17 41. Schaeferli, Y. *et al.* A unified design space of synthetic stripe-forming networks. *Nat. Commun.* **5**,  
18 4905 (2014).
- 19 42. Waldron, T. T. & Murphy, K. P. Stabilization of proteins by ligand binding: Application to drug  
20 screening and determination of unfolding energetics. *Biochemistry* **42**, 5058–5064 (2003).
- 21 43. Senisterra, G. A. *et al.* Screening for ligands using a generic and high-throughput light-  
22 scattering-based assay. *J. Biomol. Screen.* **11**, 940–948 (2006).
- 23 44. Vedadi, M. *et al.* Chemical screening methods to identify ligands that promote protein stability,  
24 protein crystallization, and structure determination. *Proc. Natl. Acad. Sci. U. S. A.* **103**, 15835–  
25 15840 (2006).

- 1 45. Molina, D. M. *et al.* Monitoring drug target engagement in cells and tissues using the cellular  
2 thermal shift assay. *Science* **341**, 84–87 (2013).
- 3 46. Myers, G. L. & Sadler, J. R. Mutational inversion of control of the lactose operon of *Escherichia*  
4 *coli*. *J. Mol. Biol.* **58**, 1–28 (1971).
- 5 47. Miller, J. H. & Schmeissner, U. Genetic studies of the *lac* repressor. X. Analysis of missense  
6 mutations in the *lacI* gene. *J. Mol. Biol.* **131**, 223–248 (1979).
- 7 48. Kleina, L. G. & Miller, J. H. Genetic studies of the *lac* repressor. XIII. Extensive amino acid  
8 replacements generated by the use of natural and synthetic nonsense suppressors. *J. Mol. Biol.*  
9 **212**, 295–318 (1990).
- 10 49. Reichheld, S. E., Yu, Z. & Davidson, A. R. The induction of folding cooperativity by ligand  
11 binding drives the allosteric response of tetracycline repressor. *Proc. Natl. Acad. Sci. U. S. A.*  
12 **106**, 22263–22268 (2009).
- 13 50. Diether, M., Nikolaev, Y., Allain, F. H. & Sauer, U. Systematic mapping of protein-metabolite  
14 interactions in central metabolism of *Escherichia coli*. *Mol. Syst. Biol.* **15**, e9008 (2019).
- 15 51. Hicks, K. G. *et al.* Protein-metabolite interactomics of carbohydrate metabolism reveal  
16 regulation of lactate dehydrogenase. *Science* **379**, 996–1003 (2023).
- 17 52. Tokuriki, N. & Tawfik, D. S. Chaperonin overexpression promotes genetic variation and  
18 enzyme evolution. *Nature* **459**, 668–673 (2009).
- 19 53. Bloom, J. D., Labthavikul, S. T., Otey, C. R. & Arnold, F. H. Protein stability promotes  
20 evolvability. *Proc. Natl. Acad. Sci. U. S. A.* **103**, 5869–5874 (2006).
- 21 54. Fasan, R., Meharena, Y. T., Snow, C. D., Poulos, T. L. & Arnold, F. H. Evolutionary history of  
22 a specialized P450 propane monooxygenase. *J. Mol. Biol.* **383**, 1069–1080 (2008).
- 23  
24

## 1 **Methods**

### 2 **Bacterial strains, media and growth conditions**

3 *Escherichia coli* strains, JW0063 (ref.<sup>55</sup>), with an eliminated kanamycin-resistance cassette  
4 (**Supplementary Fig. 4**) and XL10-Gold (Agilent Technology, Inc., Santa Clara, CA), were used for  
5 cloning and library construction. Genotypes are provided in Supplementary **Table 4**. JW0063  
6 harbouring P<sub>BAD</sub>-sfgfp-HSVtk-aph or P<sub>BAD7</sub>-sfgfp-HSVtk-aph was used as the reporter/selector strain  
7 for the directed evolution of AraC. For all the experiments, except the salicylic acid one, *E. coli* strains  
8 were grown at 37°C using appropriate antibiotics at the following concentrations in LB liquid medium  
9 (2% w/v) Lennox LB; Nacalai Tesque, Kyoto, Japan) or LB-agar plates (2% w/v) Lennox LB; Nacalai  
10 Tesque, 1.5% (w/v) agar; Nacalai Tesque), with 100 µg/mL of ampicillin (Sigma-Aldrich, Inc., St.  
11 Louis, MO), 30 µg/mL of chloramphenicol (Nacalai Tesque) and 30 µg/mL streptomycin (Nacalai  
12 Tesque). For the main culture in the salicylic acid experiment, the LB-TES medium was buffered with  
13 50 mM TES (Nacalai Tesque) and adjusted to pH 7 using NaOH. The kanamycin (Sigma-Aldrich)  
14 stock solution (30 mg/mL) for the ON-state selection was prepared by dissolving appropriate amounts  
15 of kanamycin in deionised water and filter-sterilising it through a 0.2 µm cellulose acetate filter (MN  
16 Steriliser CA, Macherey-Nagel GmbH & Co. KG, Düren, Germany). The L-arabinose (Tokyo  
17 Chemical Industry Co., Ltd., Tokyo, Japan) and D-fucose (Tokyo Chemical Industry Co., Ltd) stock  
18 solutions (both 1 M) were prepared by dissolving appropriate amounts of the compounds in deionised  
19 water and filter-sterilising through a 0.2 µm cellulose acetate filter. The salicylic acid (Nacalai Tesque)  
20 stock solution (500 mM) was prepared by dissolving appropriate amounts of the compound in ethanol.  
21 Plasmid list, primer list and plasmid information are provided in **Supplementary Table 5, 6** and  
22 **Supplementary Note 1**, respectively.

23

### 24 **Library construction**

25 **Whole-gene mutagenesis:** High-fidelity PCR was conducted using KOD DNA polymerase (TOYOBO,



1 Osaka, Japan) to amplify the *araC* region or the mutants on the pET-based vector. The resulting  
2 fragment was subjected to error-prone PCR under the following conditions: 5 U of Taq DNA  
3 polymerase (New England Biolabs, MA, USA), 200  $\mu$ M of each deoxynucleoside triphosphate, 2 mM  
4 of  $MgCl_2$  and 50  $\mu$ M of  $MnCl_2$ . The amplification factor was approximately  $10^3$ . The PCR product  
5 was digested at the *NcoI* and *BamHI* sites and ligated into a pET-based vector. The ligation mixture  
6 was transformed into JW0063 by electroporation. DNA from the transformants was extracted via  
7 miniprep to yield the library plasmid (library size is approximately  $10^6$ ).

8 ***Site-saturated mutagenesis:*** Site-saturation mutagenesis was induced for F15, M42 and I46 using  
9 ExSite PCR with the primers containing the NNK sequence (N is an equimolar mixture of dATP, dCTP,  
10 dGTP and dTTP; K is an equimolar mixture of dGTP and dTTP) at the targeted sites. After  
11 transforming the resultant plasmids into XL10-Gold, the transformants were plated on LB agar plates  
12 and grown overnight. Approximately  $10^3$  colonies from each plate were scraped and pooled and their  
13 plasmid DNA was extracted by miniprep.

#### 14

#### 15 **Gene expression analysis using fluorescent proteins as reporters**

16 For quantitative assays, JW0063 harbouring  $P_{BAD}$ -sfgfp-HSVtk-aph or  $P_{BAD7}$ -sfgfp-HSVtk-aph and  
17 plasmids encoding AraC mutant genes were first grown overnight from single colonies and then 1%  
18 cultures were inoculated into 400  $\mu$ L of LB medium containing appropriate antibiotics and L-arabinose  
19 and/or D-fucose in 96-deep well plates. These cultures were shaken at 37°C for 12 h. Then, 20  $\mu$ L  
20 cultures were diluted 10-fold with saline (0.9% (w/v) NaCl; Nacalai Tesque) in 96 shallow-well plates.  
21 Cell densities were measured using FilterMax F5 (Molecular Devices, San Jose, CA) at 595 nm. The  
22 GFP fluorescence (excitation at 485 nm and emission at 535 nm) and RFP fluorescence (excitation at  
23 585 nm and emission at 625 nm) were measured using the FilterMax F5. Fluorescence values were  
24 normalised using  $OD_{595}$ . Sensor function was defined as the difference in fluorescence intensity per  
25 OD between the two conditions. This was calculated using the following equation:

1 
$$\Delta\left(\frac{\text{fluorescence}}{OD}\right) = \frac{\text{fluorescence with } X}{OD \text{ with } X} - \frac{\text{fluorescence without } X}{OD \text{ without } X}$$

2 where X indicates target molecules, i.e. 1 mM L-arabinose, 1 mM D-fucose, 10 mM D-galactose and  
3 5 mM salicylic acid.

4 Fluorescence characterisation with flow cytometry was performed on a MACS Quant VYB  
5 (Miltenyi Biotech, Bergisch-Gladbach, Germany). The cell cultures grown in the presence or absence  
6 of 1 mM L-arabinose and/or 1 mM D-fucose were diluted 1:50 with 200  $\mu$ L of saline in a 96 shallow-  
7 well plate. We counted and measured  $5 \times 10^4$  cells using an FSC voltage of 320 V, an SSC voltage of  
8 230 V, a B1 laser (excitation at 488 nm and emission at 525/50 nm) voltage of 420 V and an Y2 laser  
9 (excitation at 561 nm and emission at 615/20 nm) voltage of 400 V. The data were analysed using a  
10 MACS Quant analyser (Miltenyi Biotech, Bergisch-Gladbach, Germany).

11

## 12 **Prediction of the stability change using FoldX**

13 The model structure of full-length AraC (ID: AF-P0A9E0-F1-model\_v2) predicted by AlphaFold2 and  
14 published in UniProt was used. To eliminate unfavourable torsion angles, van der Waals' clashes or  
15 total energy, the side chains of the model structure were rearranged using the RepairPDB command in  
16 FoldX to generate a stabilised structure. The free energy change between the wild-type and mutant  
17 ( $\Delta\Delta G$ ) was predicted using the BuildModel command with the following configuration: ionStrength =  
18 0.05, pH = 7, temperature = 298, vdwDesign = 2, moveNeighbours = true and a number of runs = 3.  
19 The mean of the three runs was used in the analysis.

20

## 21 **Data and code availability**

22 Not applicable.

23

## 24 **Methods references**

25 55. Baba, T. *et al.* Construction of *Escherichia coli* K-12 in-frame, single-gene knockout mutants:

1 the Keio collection. *Mol. Syst. Biol.* **2**, 2006.0008 (2006).

2

### 3 **Acknowledgements**

4 This project is a part of the outcome of research performed under a JSPS fellowship for young scientists  
5 (17J08108), a Waseda University Grant for Special Research Projects (2022C-465) and a Nissin Sugar  
6 Foundation.

7

### 8 **Author contributions**

9 Y.K. and D.U. conceived the project and designed the experiments; Y.K. performed all experiments  
10 with assistance from S.K.-N. and D.U.; Y.K. and D.U. wrote the manuscript.

11

### 12 **Competing interests**

13 The authors declare no competing financial interests.

14

## 1 Extended Data

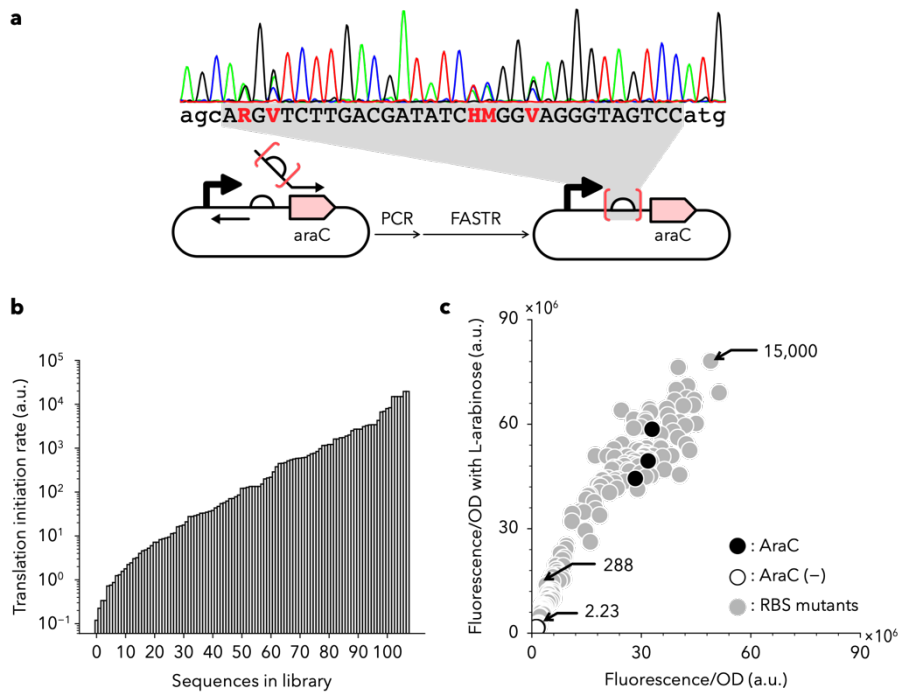

2

3 **Extended Data Fig. 1 | The effect of AraC expression level on the AraC/P<sub>BAD7</sub> system. a,**

4 Construction of the ribosome binding site (RBS) library. The degenerated RBS was designed

5 using the RBS Calculator and constructed using FASTR assembly. R, A or G; V, A, C or G;

6 H, A, C or T; M, A or C. **b,** The distribution of RBS score. **c,** The switching function of the

7 RBS variants with or without 1 mM L-arabinose. The values in the figure indicate the RBS

8 score.

9

10

1

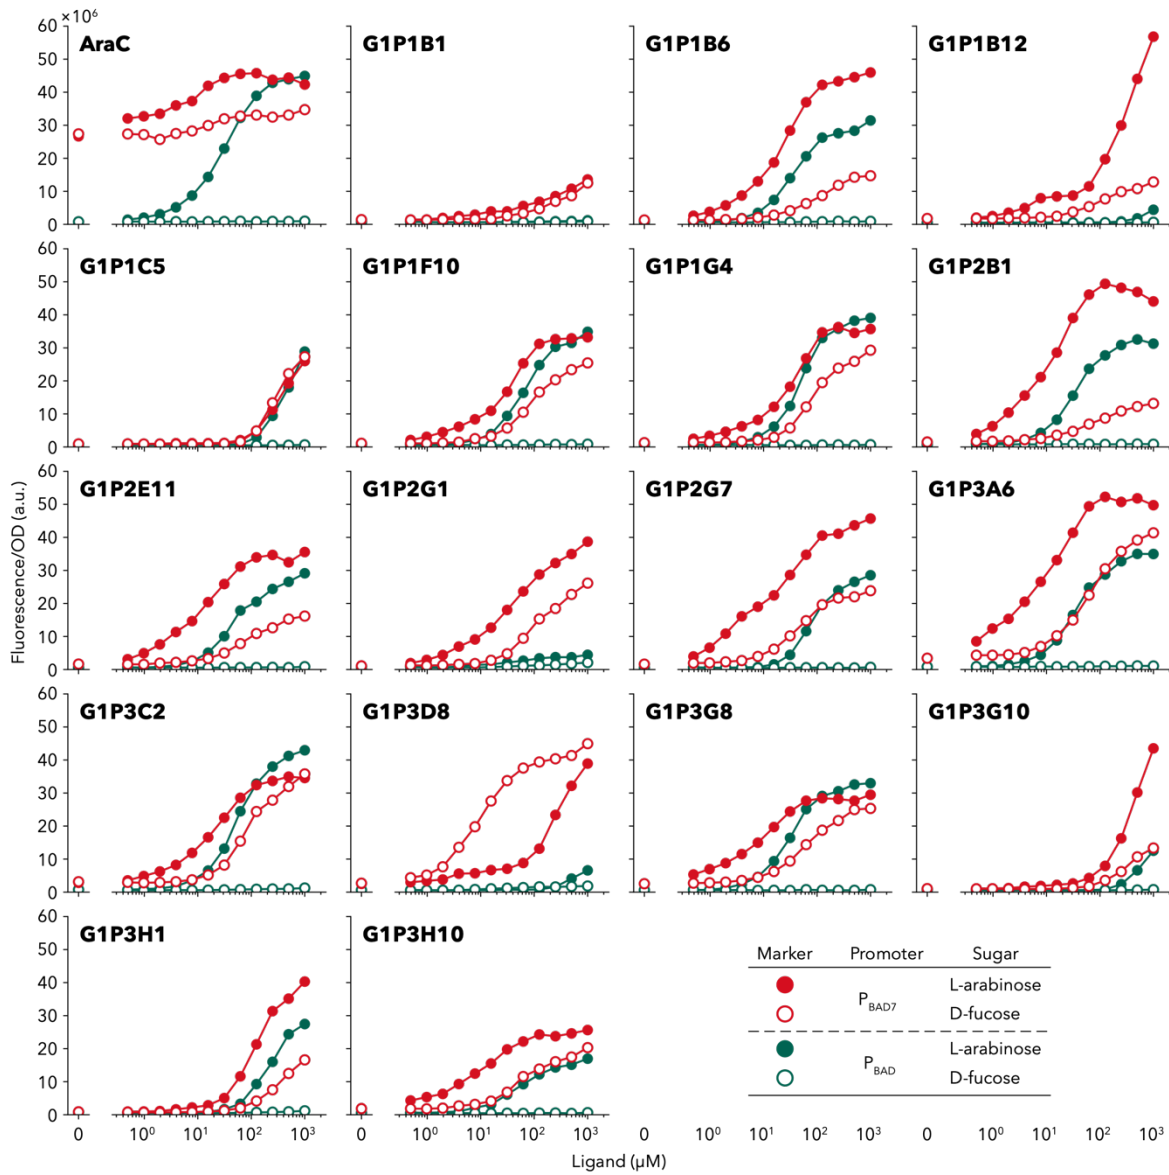

2

3 **Extended Data Fig. 2 | Dose response of AraC mutants at the  $P_{BAD}$  or  $P_{BAD7}$  promoters.**

4 The data points are connected by lines for better visualisation. These experiments were  
 5 conducted as a single measurement.

6

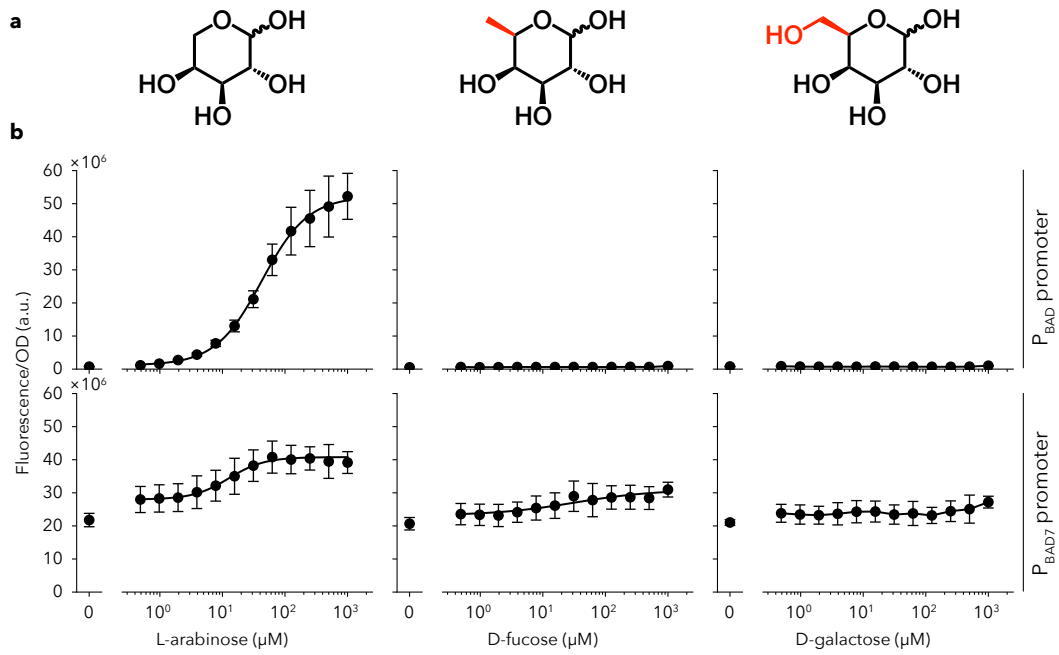

1

2 **Extended Data Fig. 3 | Target compounds and dose-response of wild-type AraC. a,**

3 **Chemical structure of L-arabinose (native ligand), D-fucose and D-galactose. b, Transfer**

4 **functions of wild-type AraC with L-arabinose, D-fucose and D-galactose at P<sub>BAD</sub> and P<sub>BAD7</sub>**

5 **promoter. Each value corresponds to the mean ± s.d. of three independent experiments.**

6

7

8

1

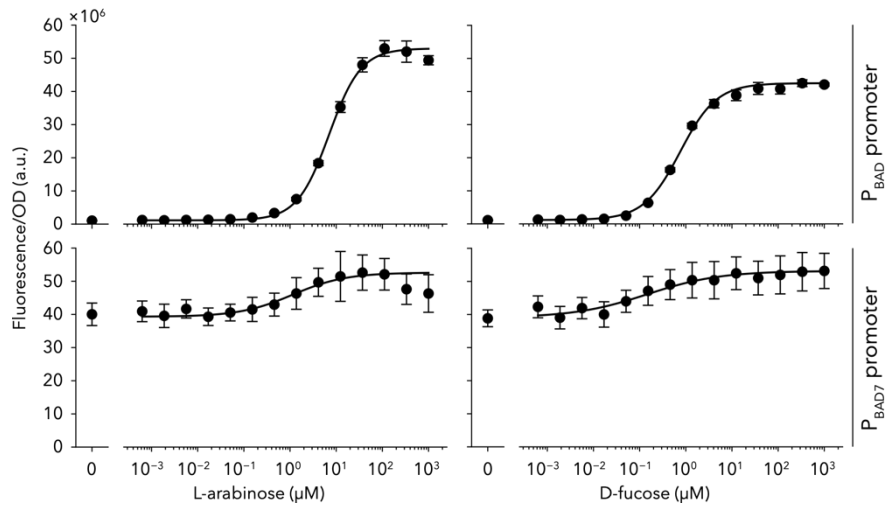

3

### Extended Data Fig. 4 | Effect of I46V on the dose-response to L-arabinose and D-fucose.

4

Dose responses were obtained by fitting the data to the Hill equation. Each value corresponds

5

to the mean  $\pm$  s.d. of three biological replicates.

6

7

8

1

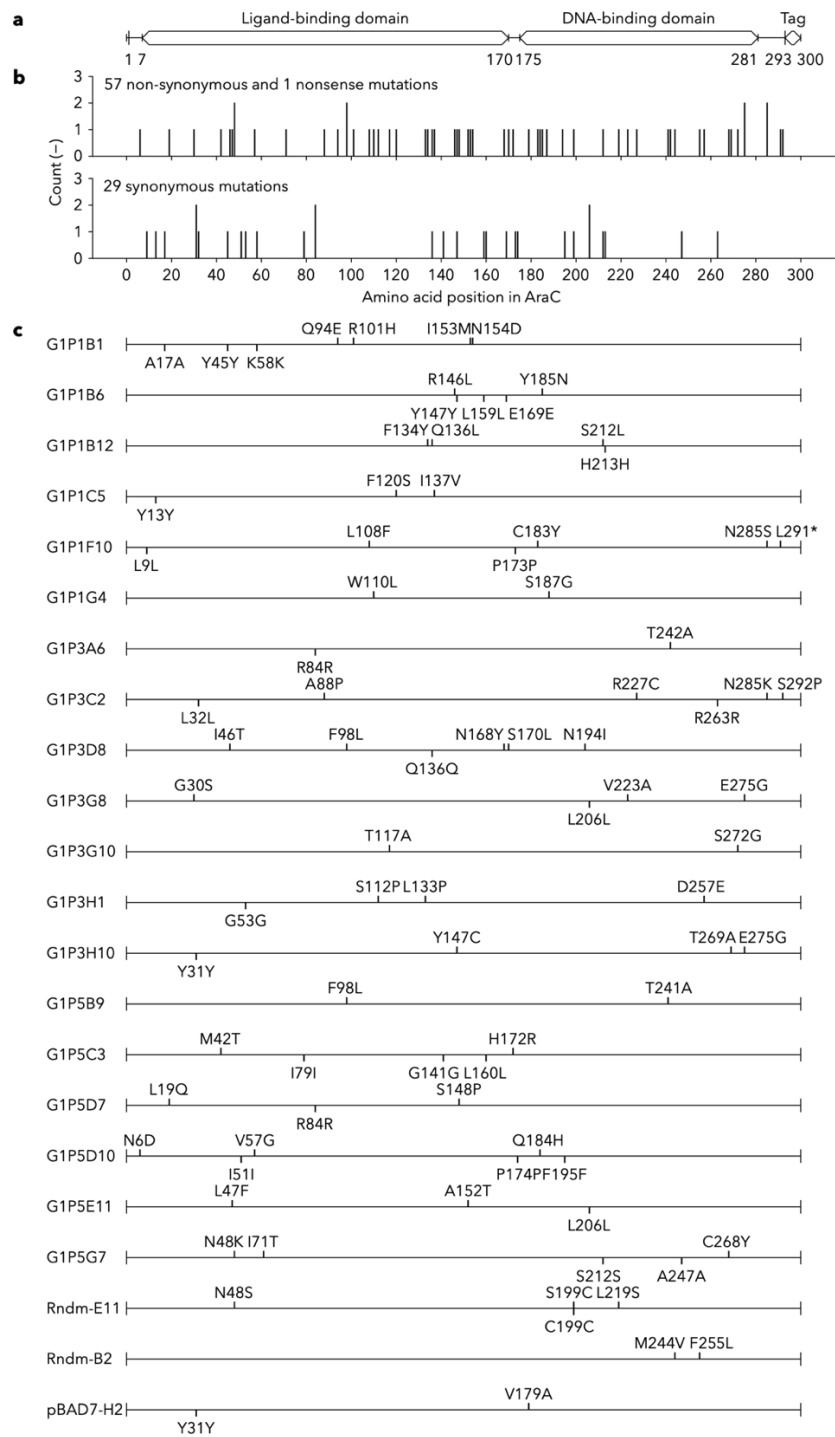

2

3 **Extended Data Fig. 5 | Distribution of mutations identified in selected D-fucose**  
 4 **responders. a**, Schematic diagram of *araC* gene. The ‘tag’ denotes a histidine-hexamer  
 5 peptide. **b**, Histogram of the non-synonymous mutations and nonsense mutation (upper) and  
 6 synonymous mutations (lower). The upper part of the bar graph shows 55 unique non-



1       synonymous mutations, 2 duplicated non-synonymous mutations and 1 nonsense mutation.  
2       The non-synonymous mutations were analysed using FoldX and depicted in the upper panel  
3       of **Fig. 2e. c**. Mutation maps for each mutant were analysed using FoldX and depicted in the  
4       lower panel of **Fig. 2e**.

5

6

1

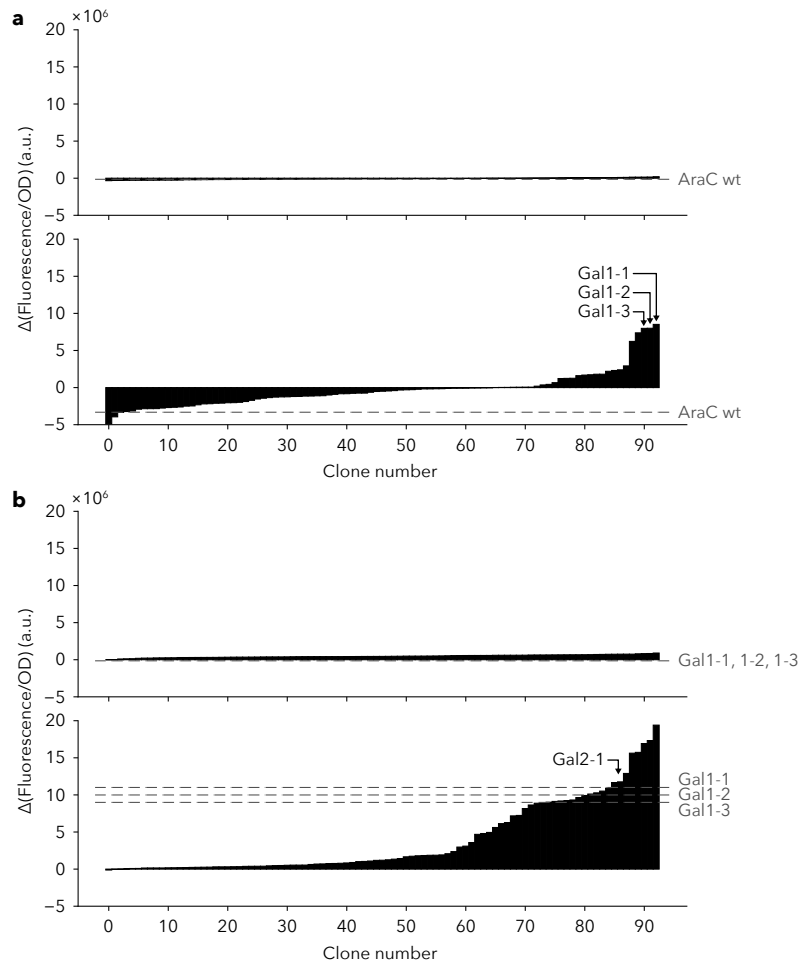

2

3 **Extended Data Fig. 6 | Directed evolution of AraC for D-galactose switch. a**, Fitness  
4 landscapes of the 1st round for the allosteric (upper) and BIF (lower) modes. The function of  
5 93 mutants randomly picked is represented as a filled bar and the function of wild-type AraC  
6 is shown as a grey dot line. **b**, Fitness landscapes of the 2nd round for the allosteric (upper)  
7 and BIF (lower) modes. The 2nd generation library was generated from a plasmid mixture of  
8 Gal1-1, Gal1-2 and Gal1-3 by error-prone PCR. The function of 93 mutants randomly picked  
9 is shown as a filled bar and the functions of Gal1-1, Gal1-2 and Gal1-3 are shown as grey dot  
10 lines. Note that Gal2-1 was elected because this mutant had a similar  $\Delta(\text{Fluorescence}/\text{OD})$   
11 value to the parental mutants but was more stringent. In **a,b**, these experiments were  
12 conducted as a single measurement.

13

1

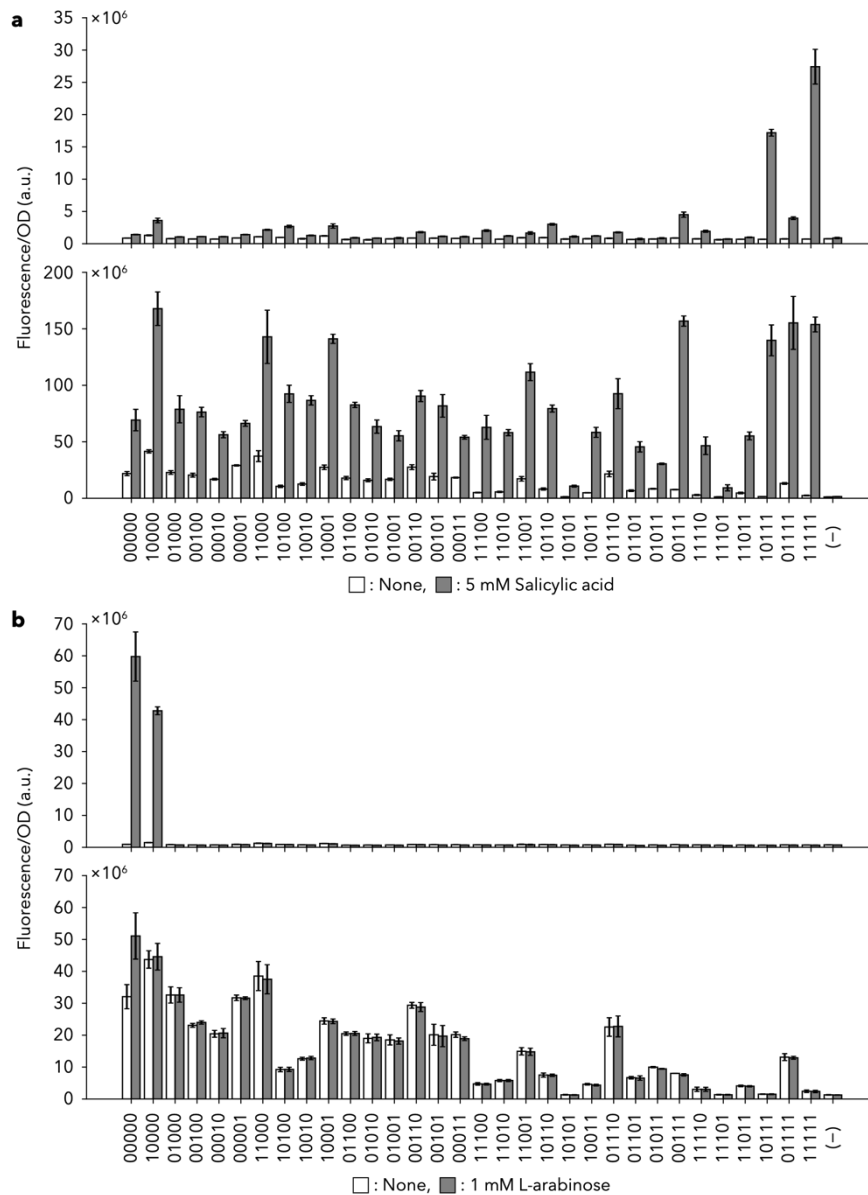

2

3 **Extended Data Fig. 7 | Salicylic acid (a) and L-arabinose (b) response of variants of Sal4,**

4 **a mutant of AraC. a,** The responses of the  $P_{BAD}$  (upper) and  $P_{BAD7}$  (lower) promoters,

5 respectively, to 5 mM salicylic acid. **b,** The responses to the  $P_{BAD}$  (upper) and  $P_{BAD7}$  (lower)

6 promoters, respectively, to 1 mM L-arabinose in LB-TES medium. In **a,b,** each value

7 corresponds to the mean  $\pm$  s.d. of 3 biological replicates. 10000, P8V; 01000, T24I; 00100,

8 H80G; 00010, Y82L; 00001, H93R. (-) indicates data from *E. coli* that does not express AraC.

9

10

1

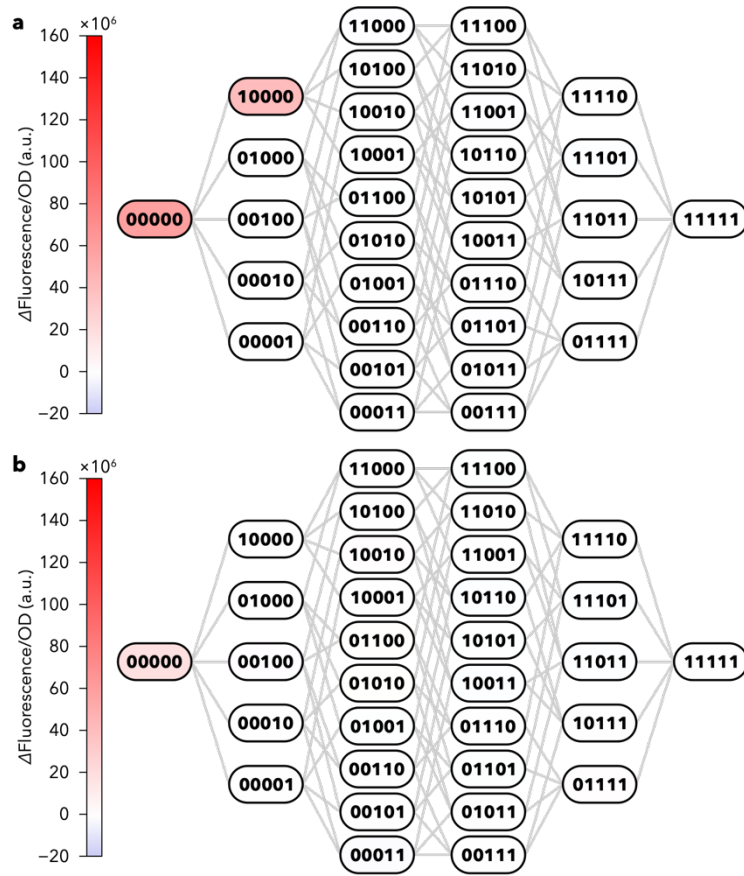

(10000 = P8V, 01000 = T24I, 00100 = H80G, 00010 = Y82L, and 00001 = H93R)

2

3

**Extended Data Fig. 8 | Fitness landscapes for L-arabinose response in the allosteric**

4

**mode (a) and BIF mode (b).** The differences between the averages of three parallel

5

experiments in **Extended Data Fig. 7b** are shown.

6

1

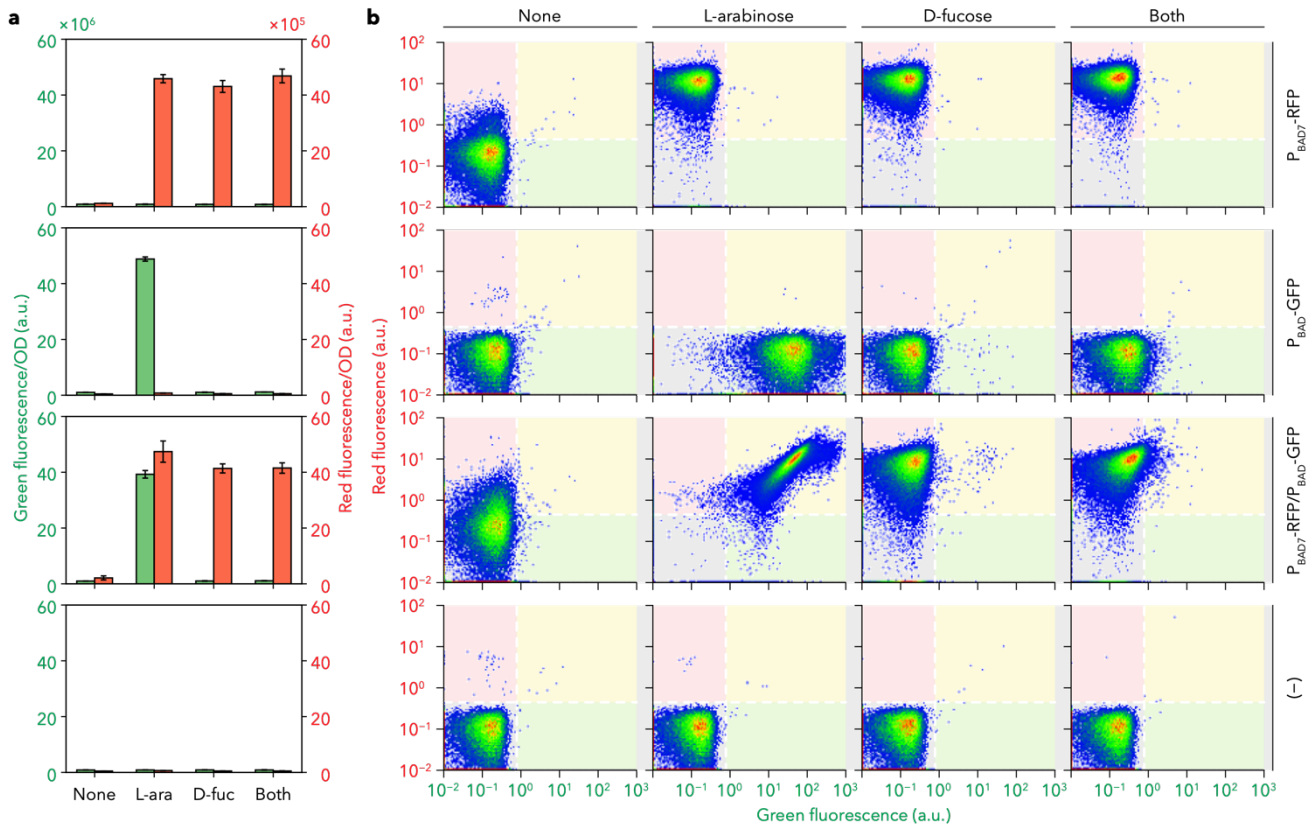

2

3 **Extended Data Fig. 9 | Construction of a ‘selective NIMPLY-OR converter’ that are**  
 4 **simultaneously regulated by a sole AraC mutant in a single cell. a, Cell culture analysis.**

5 From top to bottom: logic function of cells harbouring P<sub>BAD7</sub>-GFP, P<sub>BAD7</sub>-RFP, P<sub>BAD7</sub>-GFP and  
 6 P<sub>BAD7</sub>-RFP and no probe, respectively. Green and red filled bars indicate green and red  
 7 fluorescence/OD, respectively. Data shown in bar graphs represent the mean ± s.d. from four  
 8 experiments. **b, Cell population analysis by flow cytometry. Representative cell populations**  
 9 **from four independent experiments in a are shown.**

10

11

12

13

1  
2  
3  
4  
5  
6  
7  
8  
9  
10

## Extended Data Table 1 | Promoter sequences regulated by transcription factors.

| Name                  | DNA sequence (5' to 3')                                                                                                                                                                                                                                                                                                                         | Source              |
|-----------------------|-------------------------------------------------------------------------------------------------------------------------------------------------------------------------------------------------------------------------------------------------------------------------------------------------------------------------------------------------|---------------------|
| P <sub>BAD</sub>      | ATTCAGAGA <b>GAAACCAATTGTCCATA</b> TTGCATCAGACATTGCCGTCACCTGCGTCTTTTACTGGCTCTTCTCGCTAACCA<br>AACCGGTAACCCCGCTTATTTAAAAGCATTCTGTAAACAAAGCGGGACCAAAGCCATGACAAAAACGCGTAACAAAAGTGTC<br>TATAATCACGGCAGAAAAGTCCACATTGATTATTTGCACGGCGTCACACTTTGCTATGCCA <b>TAGCATT</b> TTTATCCATAAG<br>AT <b>TAGCGGATCCTACCTGA</b> CGCTTTTTATCGCAACTCTCTACTGTTTCTCCATA | BioBrick<br>I746908 |
| P <sub>BAD7</sub>     | <b>TAGCATT</b> TTTATCCATAAGAT <b>TAGCATT</b> TTTATCCATA <b>GAT</b> CTCGGTACCGAATTCATTGTCTACTGTTTCTA                                                                                                                                                                                                                                             | Ref. 23             |
| P <sub>BAD7/OR2</sub> | <b>TAGCATT</b> TTTATCCATAAGAT <b>TAGCATT</b> TTTATCCATA <b>GAT</b> CC <b>TAACACCGTGCGTGTG</b> TCTACTGTTTCTA                                                                                                                                                                                                                                     | This study          |

−35 box, −10 box and +1 site are underlined. AraC-binding sites (O2, I1 and I2) and a lambda cI-binding site (cIO) are shown in orange and blue, respectively.
